# Supplementary material for: Psychosocial Well-being and Genetic Predisposition Shape Responsiveness to Lifestyle Coaching: Insights from a Risk-Stratified Intervention Trial
Source: Research Square preprint supplement (doi:10.21203/rs.3.rs-7638506/v1), 2025-10-10
Supplement: Supplementary file 1 [file 6f06d6d13b86b69ff4dcb392.xlsx]

## Sheet: Cover
Supplementary Tables Overview
This Excel workbook contains supplementary Tables 1 through 28 summarizing statistical analyses from the study.
Each worksheet presents a distinct statistical summary, with the table title and notes describing modeling approaches, covariate adjustments, and interpretation.
Abbreaviations used include : BMI = Body Mass Index, BP = Blood Pressure, C-Reactive Protein, CHD = Coronary Heart Disease, FDR = False Discovery Rate, GEE = Generalized Estimating Equations, PRS = Polygenic Risk Score, T2D = Type 2 Diabetes

## Sheet: Table 1
Supplementary Table 1. Groupwise comparisons of baseline phenotypes across cardiometabolic risk groups
Outcome	Comparison	N	Estimate	Standard Error	Wald	P	FDR
Diastolic BP (mmHg)	Cardiometabolic risk : High vs. Low	483	-5.93	1.07	30.73	2.97e-08	5.94e-08
Diastolic BP (mmHg)	Cardiometabolic risk : High vs. Medium	305	-3.50	1.10	10.13	1.46e-03	1.55e-03
Systolic BP (mmHg)	Cardiometabolic risk : High vs. Low	483	-5.24	1.48	12.58	3.91e-04	3.91e-04
Systolic BP (mmHg)	Cardiometabolic risk : High vs. Medium	304	-4.77	1.51	10.02	1.55e-03	1.55e-03
Weight (kg)	Cardiometabolic risk : High vs. Low	483	-11.13	1.70	42.90	5.77e-11	5.77e-11
Weight (kg)	Cardiometabolic risk : High vs. Medium	304	-5.56	1.74	10.17	1.43e-03	1.43e-03
Body Mass Index (kg/m^2)	Cardiometabolic risk : High vs. Low	483	-3.41	0.47	52.03	5.46e-13	1.09e-12
Body Mass Index (kg/m^2)	Cardiometabolic risk : High vs. Medium	304	-1.56	0.48	10.58	1.14e-03	1.43e-03
Waist circumference (cm)	Cardiometabolic risk : High vs. Low	486	-10.17	1.26	64.81	7.77e-16	3.11e-15
Waist circumference (cm)	Cardiometabolic risk : High vs. Medium	310	-4.12	1.27	10.54	1.17e-03	1.43e-03
Neck circumference (cm)	Cardiometabolic risk : High vs. Low	487	-2.45	0.34	50.52	1.18e-12	1.57e-12
Neck circumference (cm)	Cardiometabolic risk : High vs. Medium	308	-1.26	0.36	12.49	4.08e-04	1.43e-03
BMI Polygenic Risk Score	Cardiometabolic risk : High vs. Low	487	-0.29	0.11	6.64	9.95e-03	0.03
BMI Polygenic Risk Score	Cardiometabolic risk : High vs. Medium	303	-0.04	0.12	0.14	0.70	0.87
CHD Polygenic Risk Score	Cardiometabolic risk : High vs. Low	487	-0.20	0.11	3.51	0.06	0.09
CHD Polygenic Risk Score	Cardiometabolic risk : High vs. Medium	303	0.02	0.11	0.03	0.87	0.87
T2D Polygenic Risk Score	Cardiometabolic risk : High vs. Low	487	-0.14	0.12	1.23	0.27	0.27
T2D Polygenic Risk Score	Cardiometabolic risk : High vs. Medium	303	-0.04	0.13	0.09	0.77	0.87
Note: Groupwise comparisons conducted using Generalized Estimating Equations (GEE). Models: Anthropometrics ~ Cardiometabolic risk group + Age + Gender + Education + Smoking; Blood pressure ~ Cardiometabolic risk group + Age + Gender + Education + Smoking + antihypertensive medication; Polygenic Risk Score (PRS) ~ Cardiometabolic risk group + Age + Gender + Cohort + Language. False Discovery Rate…

## Sheet: Table 2
Supplementary Table 2. Baseline biomarker levels across low, medium, and high cardiometabolic risk groups
	Low cardiometabolic risk	Medium cardiometabolic risk	High cardiometabolic risk
N	394	213	104
Gender (Male / Female)	215 / 179	170 / 43	92 / 12
Cohort (Nk / Rv / Kk)	317 / 40 / 37	172 / 22 / 19	83 / 11 / 10
Language (Finnish / English)	337 / 57	178 / 35	76 / 28
Wellbeing Cluster (Good / Hard / Life / Reco / Mult)	107 / 90 / 97 / 58 / 33	42 / 50 / 65 / 23 / 28	21 / 15 / 42 / 12 / 11
Smoking Status (Yes / Occasional smoker / No)	8 / 21 / 360	7 / 14 / 191	7 / 7 / 90
Age (years)	44.48 ± 8.87	46.31 ± 8.12	45.25 ± 8.51
Apolipoprotein B	0.80 ± 0.15 #	1.03 ± 0.14 #	1.22 ± 0.15
Apolipoprotein A1	1.67 ± 0.22 #	1.46 ± 0.17 #	1.31 ± 0.16
ApoB/ApoA1 ratio	0.49 ± 0.09 #	0.71 ± 0.06 #	0.94 ± 0.12
Cholesterol	4.94 ± 0.79 #	5.51 ± 0.79 #	6.02 ± 0.80
Low-Density Lipoprotein	2.91 ± 0.65 #	3.62 ± 0.60 #	4.10 ± 0.73
High-Density Lipoprotein	1.63 ± 0.32 #	1.29 ± 0.23 #	1.11 ± 0.21
Triglycerides	0.88 ± 0.35 #	1.30 ± 0.54 #	1.72 ± 0.82
Glucose	5.47 ± 0.43 #	5.65 ± 0.44	5.69 ± 0.43
Uric Acid	298.42 ± 70.63 #	349.00 ± 69.24 #	380.36 ± 71.01
Alanine Transaminase	23.42 ± 11.03 #	29.87 ± 12.95 #	35.86 ± 15.25
High-sensitivity CRP	1.11 ± 1.20 #	1.38 ± 1.36 #	1.79 ± 1.55
Note: Values represent raw means and standard deviations. # indicates FDR < 0.05 compared to the high cardiometabolic risk group based on GEE analyses. Models: Biomarkers ~ Cardiometabolic risk group + Age + Gender + Education + Smoking. Biomarkers High-sensitivity C-Reactive Protein (CRP), Triglycerides, Alanine Transaminase were log-transformed. Statistics are presented in Supplementary Table 3.
	#

## Sheet: Table 3
Supplementary Table 3. Groupwise model-based comparisons of baseline biomarkers across cardiometabolic risk groups
Outcome	Comparison	N	Estimate	Standard Error	Wald	P	FDR
Apolipoprotein A1	Cardiometabolic risk : High vs. Low	472	0.33	0.02	279.14	< 2.2e-16	< 2.2e-16
Apolipoprotein A1	Cardiometabolic risk : High vs. Medium	296	0.14	0.02	45.26	1.73e-11	4.03e-11
Apolipoprotein B	Cardiometabolic risk : High vs. Low	472	-0.41	0.02	497.29	< 2.2e-16	< 2.2e-16
Apolipoprotein B	Cardiometabolic risk : High vs. Medium	296	-0.19	0.02	103.49	< 2.2e-16	< 2.2e-16
High-sensitivity CRP	Cardiometabolic risk : High vs. Low	465	-0.28	0.06	23.18	1.48e-06	1.48e-06
High-sensitivity CRP	Cardiometabolic risk : High vs. Medium	292	-0.15	0.06	6.11	1.00e-02	1.00e-02
Alanine Transaminase	Cardiometabolic risk : High vs. Low	466	-0.29	0.05	33.66	6.55e-09	1.31e-08
Alanine Transaminase	Cardiometabolic risk : High vs. Medium	291	-0.15	0.05	8.05	4.55e-03	9.09e-03
Triglycerides	Cardiometabolic risk : High vs. Low	470	-0.33	0.03	119.02	< 2.2e-16	< 2.2e-16
Triglycerides	Cardiometabolic risk : High vs. Medium	293	-0.15	0.03	22.06	2.65e-06	2.65e-06
Uric Acid	Cardiometabolic risk : High vs. Low	475	-57.10	8.18	48.70	2.99e-12	5.98e-12
Uric Acid	Cardiometabolic risk : High vs. Medium	302	-24.29	8.50	8.16	4.27e-03	8.54e-03
High-Density Lipoprotein	Cardiometabolic risk : High vs. Low	474	0.45	0.03	275.06	< 2.2e-16	< 2.2e-16
High-Density Lipoprotein	Cardiometabolic risk : High vs. Medium	302	0.15	0.03	33.17	8.46e-09	1.33e-08
Cholesterol	Cardiometabolic risk : High vs. Low	474	-1.10	0.09	142.78	< 2.2e-16	< 2.2e-16
Cholesterol	Cardiometabolic risk : High vs. Medium	299	-0.55	0.10	30.68	3.04e-08	3.55e-08
Glucose	Cardiometabolic risk : High vs. Low	474	-0.13	0.05	6.67	9.79e-03	9.79e-03
Glucose	Cardiometabolic risk : High vs. Medium	303	-0.02	0.05	0.19	6.60e-01	6.60e-01
Low-Density Lipoprotein	Cardiometabolic risk : High vs. Low	473	-1.16	0.08	199.07	< 2.2e-16	< 2.2e-16
Low-Density Lipoprotein	Cardiometabolic risk : High vs. Medium	297	-0.50	0.09	32.94	9.49e-09	1.33e-08
ApoB/ApoA1 ratio	Cardiometabolic risk : High vs. Low	472	-0.44	0.01	1077.72	< 2.2e-16	< 2.2e-16
ApoB/ApoA1 ratio	Cardiometabolic risk : High vs. Medium	296	-0.23	0.01	313.19	< 2.2e-16	< 2.2e-16
Note: Groupwise comparisons conducted using GEE. Models: Biomarkers ~ Cardiometabolic risk group + Age + Gender + Education + Smoking. High-sensitivity CRP, Triglycerides, Alanine Transaminase were log-transformed. FDR correction was applied separately within specified biomarker domains.

## Sheet: Table 4
Supplementary Table 4. Groupwise comparisons of baseline phenotypes between intervention and control groups within medium- and high cardiometabolic risk strata
Outcome	Comparison	N	Estimate	Standard Error	Wald	P	FDR
Diastolic BP (mmHg)	Medium cardiometabolic risk: Intervention vs. Control	204	1.58	1.27	1.56	0.21	0.21
Systolic BP (mmHg)	Medium cardiometabolic risk: Intervention vs. Control	203	2.41	1.69	2.04	0.15	0.21
Weight (kg)	Medium cardiometabolic risk: Intervention vs. Control	203	-0.37	1.81	0.04	0.84	0.84
Body Mass Index (kg/m^2)	Medium cardiometabolic risk: Intervention vs. Control	203	-0.53	0.52	1.06	0.30	0.84
Waist circumference (cm)	Medium cardiometabolic risk: Intervention vs. Control	207	-0.77	1.38	0.31	0.58	0.84
Neck circumference (cm)	Medium cardiometabolic risk: Intervention vs. Control	205	0.09	0.40	0.05	0.82	0.84
Diastolic BP (mmHg)	High cardiometabolic risk: Intervention vs. Control	101	-2.79	1.80	2.40	0.12	0.24
Systolic BP (mmHg)	High cardiometabolic risk: Intervention vs. Control	101	-2.90	2.59	1.26	0.26	0.26
Weight (kg)	High cardiometabolic risk: Intervention vs. Control	101	-6.43	3.12	4.25	0.04	0.052
Body Mass Index (kg/m^2)	High cardiometabolic risk: Intervention vs. Control	101	-1.71	0.82	4.31	0.04	0.052
Waist circumference (cm)	High cardiometabolic risk: Intervention vs. Control	103	-5.97	2.19	7.40	6.52e-03	0.03
Neck circumference (cm)	High cardiometabolic risk: Intervention vs. Control	103	-1.16	0.60	3.71	0.054	0.054
BMI Polygenic Risk Score	High cardiometabolic risk: Intervention vs. Control	98	0.01	0.19	5.02e-03	0.94	0.94
CHD Polygenic Risk Score	High cardiometabolic risk: Intervention vs. Control	98	0.03	0.19	0.03	0.86	0.94
T2D Polygenic Risk Score	High cardiometabolic risk: Intervention vs. Control	98	0.25	0.21	1.43	0.23	0.70
BMI Polygenic Risk Score	Medium cardiometabolic risk: Intervention vs. Control	205	0.15	0.13	1.42	0.23	0.70
CHD Polygenic Risk Score	Medium cardiometabolic risk: Intervention vs. Control	205	-0.04	0.13	0.11	0.74	0.74
T2D Polygenic Risk Score	Medium cardiometabolic risk: Intervention vs. Control	205	-0.10	0.14	0.47	0.49	0.74
Note: Comparisons within cardiometabolic risk groups between intervention and control arms were performed using GEE. Models: Anthropometrics ~ Intervention group + Age + Gender + Education + Smoking; Blood pressure ~ Intervention group + Age + Gender + Education + Smoking + Antihypertensive medication; PRS ~ Intervention group + Age + Gender + Cohort + Language. FDR correction was applied separat…

## Sheet: Table 5
Supplementary Table 5. Baseline biomarker profile comparisons between intervention and control groups within medium- and high cardiometabolic risk strata
Outcome	Comparison	N	Estimate	Standard Error	Wald	P	FDR
Apolipoprotein A1	High cardiometabolic risk: Intervention vs. Control	93	0.03	0.03	0.64	0.42	0.85
Apolipoprotein B	High cardiometabolic risk: Intervention vs. Control	93	0.01	0.03	0.11	0.74	0.85
High-sensitivity CRP	High cardiometabolic risk: Intervention vs. Control	92	-0.22	0.10	5.09	0.02	0.05
Alanine Transaminase	High cardiometabolic risk: Intervention vs. Control	91	-0.04	0.09	0.25	0.61	0.61
Triglycerides	High cardiometabolic risk: Intervention vs. Control	92	0.02	0.06	0.14	0.71	0.85
Uric Acid	High cardiometabolic risk: Intervention vs. Control	95	-3.76	15.27	0.06	0.81	0.81
High-Density Lipoprotein	High cardiometabolic risk: Intervention vs. Control	94	0.05	0.04	1.30	0.25	0.85
Cholesterol	High cardiometabolic risk: Intervention vs. Control	94	0.09	0.16	0.30	0.58	0.85
Glucose	High cardiometabolic risk: Intervention vs. Control	95	-0.05	0.08	0.34	0.56	0.61
Low-Density Lipoprotein	High cardiometabolic risk: Intervention vs. Control	93	0.03	0.14	0.04	0.85	0.85
ApoB/ApoA1 Ratio	High cardiometabolic risk: Intervention vs. Control	93	-9.33e-03	0.02	0.16	0.69	0.85
Apolipoprotein A1	Medium cardiometabolic risk: Intervention vs. Control	203	-0.02	0.02	0.50	0.48	0.89
Apolipoprotein B	Medium cardiometabolic risk: Intervention vs. Control	203	3.66e-03	0.02	0.04	0.84	0.89
High-sensitivity CRP	Medium cardiometabolic risk: Intervention vs. Control	200	-0.05	0.06	0.74	0.39	0.62
Alanine Transaminase	Medium cardiometabolic risk: Intervention vs. Control	200	-0.12	0.06	4.87	0.03	0.05
Triglycerides	Medium cardiometabolic risk: Intervention vs. Control	201	-7.38e-03	0.03	0.06	0.81	0.89
Uric Acid	Medium cardiometabolic risk: Intervention vs. Control	207	4.44	9.02	0.24	0.62	0.62
High-Density Lipoprotein	Medium cardiometabolic risk: Intervention vs. Control	208	-9.01e-03	0.03	0.09	0.76	0.89
Cholesterol	Medium cardiometabolic risk: Intervention vs. Control	205	0.02	0.11	0.02	0.88	0.89
Glucose	Medium cardiometabolic risk: Intervention vs. Control	208	2.52e-03	0.06	1.67e-03	0.97	0.97
Low-Density Lipoprotein	Medium cardiometabolic risk: Intervention vs. Control	204	0.01	0.08	0.02	0.89	0.89
ApoB/ApoA1 Ratio	Medium cardiometabolic risk: Intervention vs. Control	203	9.80e-03	7.67e-03	1.63	0.20	0.89
Note: Baseline comparisons within cardiometabolic risk groups between intervention and control arms were conducted using generalized estimating equations (GEE). Model: Biomarker ~ Intervention group + Age + Gender + Education + Smoking. CRP, Triglycerides, and ALAT were log-transformed. FDR correction was applied within biomarker domains.

## Sheet: Table 6
Supplementary Table 6. Statistics for phenotypes over time between intervention and control groups
Outcome	Term	Comparison	N	Estimate	Standard Error	Wald	P	FDR
Diastolic BP (mmHg)	Time x Group	High cardiometabolic risk: Intervention vs. Control	99	-0.12	1.40	7.85e-03	0.93	0.93
Systolic BP (mmHg)	Time x Group	High cardiometabolic risk: Intervention vs. Control	99	-1.72	1.87	0.84	0.36	0.72
Weight (kg)	Time x Group	High cardiometabolic risk: Intervention vs. Control	101	-0.86	0.44	3.80	0.051	0.13
Body Mass Index (kg/m^2)	Time x Group	High cardiometabolic risk: Intervention vs. Control	101	-0.26	0.14	3.44	0.06	0.13
Waist circumference (cm)	Time x Group	High cardiometabolic risk: Intervention vs. Control	103	0.22	0.89	0.06	0.81	0.81
Neck circumference (cm)	Time x Group	High cardiometabolic risk: Intervention vs. Control	103	-0.45	0.33	1.89	0.17	0.23
Diastolic BP (mmHg)	Time x Group	Medium cardiometabolic risk: Intervention vs. Control	199	-1.13	0.99	1.31	0.25	0.25
Systolic BP (mmHg)	Time x Group	Medium cardiometabolic risk: Intervention vs. Control	198	-1.73	1.30	1.78	0.18	0.25
Weight (kg)	Time x Group	Medium cardiometabolic risk: Intervention vs. Control	203	-0.41	0.36	1.27	0.26	0.47
Body Mass Index (kg/m^2)	Time x Group	Medium cardiometabolic risk: Intervention vs. Control	203	-0.15	0.12	1.58	0.21	0.47
Waist circumference (cm)	Time x Group	Medium cardiometabolic risk: Intervention vs. Control	207	-0.69	0.74	0.86	0.35	0.47
Neck circumference (cm)	Time x Group	Medium cardiometabolic risk: Intervention vs. Control	205	0.03	0.24	0.02	0.89	0.89
Note: Repeated measures GEE models were used to calculate Time*Group interaction for phenotypes. Models were adjusted for Age, Gender, Education, and Smoking. Blood pressure models were additionally adjusted for Antihypertensive medication and BMI at baseline. FDR correction was applied separately for domains of anthropometrics and blood pressure measures.

## Sheet: Table 7 
Supplementary Table 7. Statistics for biomarkers over time between intervention and control groups
Outcome	Term	Comparison	N	Estimate	Standard Error	Wald	P	FDR
Apolipoprotein A1	Time x Group	High cardiometabolic risk: Intervention vs. Control	90	-0.02	0.02	1.33	0.25	0.81
Apolipoprotein B	Time x Group	High cardiometabolic risk: Intervention vs. Control	90	-0.03	0.02	1.94	0.16	0.81
Uric Acid	Time x Group	High cardiometabolic risk: Intervention vs. Control	92	-3.09	5.88	0.28	0.60	0.60
High-Density Lipoprotein	Time x Group	High cardiometabolic risk: Intervention vs. Control	91	0.01	0.02	0.41	0.52	0.81
Cholesterol	Time x Group	High cardiometabolic risk: Intervention vs. Control	91	-0.02	0.09	0.06	0.81	0.81
Glucose	Time x Group	High cardiometabolic risk: Intervention vs. Control	92	-0.09	0.05	2.78	0.10	0.10
Low-Density Lipoprotein	Time x Group	High cardiometabolic risk: Intervention vs. Control	90	-0.02	0.08	0.06	0.81	0.81
ApoB/ApoA1 ratio	Time x Group	High cardiometabolic risk: Intervention vs. Control	90	-5.75e-03	0.01	0.15	0.70	0.81
High-sensitivity CRP	Time x Group	High cardiometabolic risk: Intervention vs. Control	89	0.04	0.07	0.36	0.55	0.60
Alanine Transaminase	Time x Group	High cardiometabolic risk: Intervention vs. Control	88	0.07	0.04	3.00	0.08	0.10
Triglycerides	Time x Group	High cardiometabolic risk: Intervention vs. Control	89	-0.01	0.03	0.20	0.65	0.81
Apolipoprotein A1	Time x Group	Medium cardiometabolic risk: Intervention vs. Control	194	0.02	0.02	0.95	0.33	0.41
Apolipoprotein B	Time x Group	Medium cardiometabolic risk: Intervention vs. Control	194	-0.02	0.02	0.87	0.35	0.41
Uric Acid	Time x Group	Medium cardiometabolic risk: Intervention vs. Control	198	-1.75	6.60	0.07	0.79	0.79
High-Density Lipoprotein	Time x Group	Medium cardiometabolic risk: Intervention vs. Control	199	0.03	0.02	1.39	0.24	0.41
Cholesterol	Time x Group	Medium cardiometabolic risk: Intervention vs. Control	196	-0.13	0.09	2.15	0.14	0.41
Glucose	Time x Group	Medium cardiometabolic risk: Intervention vs. Control	199	0.03	0.05	0.25	0.62	1.00
Low-Density Lipoprotein	Time x Group	Medium cardiometabolic risk: Intervention vs. Control	196	-0.09	0.07	1.52	0.22	0.41
ApoB/ApoA1 ratio	Time x Group	Medium cardiometabolic risk: Intervention vs. Control	194	-0.02	0.01	2.22	0.14	0.41
High-sensitivity CRP	Time x Group	Medium cardiometabolic risk: Intervention vs. Control	192	-0.03	0.05	0.41	0.52	0.79
Alanine Transaminase	Time x Group	Medium cardiometabolic risk: Intervention vs. Control	191	1.68e-04	0.05	1.29e-05	1.00	1.00
Triglycerides	Time x Group	Medium cardiometabolic risk: Intervention vs. Control	193	-0.01	0.03	0.27	0.61	0.61
Note: Repeated measures GEE models were used to calculate Time*Group interaction for biomarkr profiles. Models were adjusted for Age, Gender, Education, Smoking, and BMI baseline. CRP, triglycerides, and ALAT were log-transformed. FDR correction was applied separately for biomarker domains.

## Sheet: Table 8
Supplementary Table 8. Timewise analysis of phenotype changes within each cardiometabolic risk group arm
Outcome	Group	Term	N	Estimate	Standard Error	Wald	P	FDR
Diastolic BP (mmHg)	Medium cardiometabolic risk : Control	Time	98	-1.35	0.69	3.81	0.051	0.051
Systolic BP (mmHg)	Medium cardiometabolic risk : Control	Time	97	-2.23	0.97	5.30	0.02	0.04
Weight (kg)	Medium cardiometabolic risk : Control	Time	101	-0.67	0.26	6.50	0.01	0.04
Body Mass Index (kg/m^2)	Medium cardiometabolic risk : Control	Time	101	-0.18	0.08	4.64	0.03	0.06
Waist circumference (cm)	Medium cardiometabolic risk : Control	Time	104	-0.60	0.57	1.08	0.30	0.39
Neck circumference (cm)	Medium cardiometabolic risk : Control	Time	103	0.13	0.15	0.74	0.39	0.39
Diastolic BP (mmHg)	High cardiometabolic risk : Control	Time	49	-2.84	0.92	9.49	2.07e-03	4.14e-03
Systolic BP (mmHg)	High cardiometabolic risk : Control	Time	49	-2.78	1.40	3.97	0.046	0.046
Weight (kg)	High cardiometabolic risk : Control	Time	50	-0.86	0.37	5.46	0.02	0.03
Body Mass Index (kg/m^2)	High cardiometabolic risk : Control	Time	50	-0.24	0.10	5.52	0.02	0.03
Waist circumference (cm)	High cardiometabolic risk : Control	Time	51	-2.73	0.65	17.64	2.67e-05	1.07e-04
Neck circumference (cm)	High cardiometabolic risk : Control	Time	51	0.13	0.21	0.37	0.54	0.54
Diastolic BP (mmHg)	Medium cardiometabolic risk : Intervention	Time	101	-2.36	0.72	10.74	1.05e-03	1.05e-03
Systolic BP (mmHg)	Medium cardiometabolic risk : Intervention	Time	101	-3.82	0.88	18.89	1.38e-05	2.77e-05
Weight (kg)	Medium cardiometabolic risk : Intervention	Time	102	-1.06	0.25	18.44	1.76e-05	7.03e-05
Body Mass Index (kg/m^2)	Medium cardiometabolic risk : Intervention	Time	102	-0.34	0.08	16.13	5.92e-05	1.18e-04
Waist circumference (cm)	Medium cardiometabolic risk : Intervention	Time	103	-1.29	0.47	7.47	6.28e-03	8.38e-03
Neck circumference (cm)	Medium cardiometabolic risk : Intervention	Time	102	0.12	0.18	0.48	0.49	0.49
Diastolic BP (mmHg)	High cardiometabolic risk : Intervention	Time	50	-2.87	1.06	7.32	6.80e-03	6.80e-03
Systolic BP (mmHg)	High cardiometabolic risk : Intervention	Time	50	-4.63	1.21	14.71	1.26e-04	2.51e-04
Weight (kg)	High cardiometabolic risk : Intervention	Time	51	-1.50	0.31	23.38	1.33e-06	5.31e-06
Body Mass Index (kg/m^2)	High cardiometabolic risk : Intervention	Time	51	-0.46	0.10	21.50	3.54e-06	7.08e-06
Waist circumference (cm)	High cardiometabolic risk : Intervention	Time	52	-2.37	0.62	14.69	1.27e-04	1.69e-04
Neck circumference (cm)	High cardiometabolic risk : Intervention	Time	52	-0.30	0.25	1.40	0.24	0.24
Note: Time effects were evaluated using GEE adjusting for Age, Gender, Education, and Smoking. Models also included adjustment for Antihypertensive medication use and BMI baseline, when applicable for BP measures. FDR correction was applied separately for anthropometrics and blood pressure within each domain.

## Sheet: Table 9
Supplementary Table 9. Biomarker profile characteristics by risk and intervention group at baseline and follow-up
	Medium cardiometabolic risk (Intervention, baseline)	Medium cardiometabolic risk (Intervention, follow-up)	Medium cardiometabolic risk (Control, baseline)	Medium cardiometabolic risk (Control, follow-up)	High cardiometabolic risk (Intervention, baseline)	High cardiometabolic risk (Intervention, follow-up)	High cardiometabolic risk (Control, baseline)	High cardiometabolic risk (Control, follow-up)
N	107	97	106	90	53	52	51	44
Apolipoprotein B	1.03 ± 0.14	0.98 ± 0.14 **	1.03 ± 0.14	1.00 ± 0.18 **	1.22 ± 0.14	1.13 ± 0.14 **	1.22 ± 0.17	1.17 ± 0.17 **
Low-Density Lipoprotein	3.61 ± 0.65	3.44 ± 0.60 **	3.63 ± 0.56	3.52 ± 0.69 *	4.09 ± 0.74	3.87 ± 0.77 **	4.12 ± 0.72	3.98 ± 0.71
ApoB/ApoA1 Ratio	0.71 ± 0.05	0.68 ± 0.10 **	0.70 ± 0.06	0.68 ± 0.11 *	0.93 ± 0.11	0.84 ± 0.10 **	0.95 ± 0.13	0.86 ± 0.12 **
Cholesterol	5.50 ± 0.81	5.29 ± 0.75 **	5.52 ± 0.77	5.40 ± 0.90 *	6.06 ± 0.73	5.78 ± 0.85 **	5.97 ± 0.88	5.81 ± 0.85 *
High-Density Lipoprotein	1.28 ± 0.20	1.29 ± 0.24	1.30 ± 0.26	1.30 ± 0.25	1.13 ± 0.22	1.15 ± 0.25	1.09 ± 0.20	1.11 ± 0.20
Glucose	5.65 ± 0.43	5.66 ± 0.45	5.65 ± 0.46	5.63 ± 0.42	5.67 ± 0.40	5.63 ± 0.38	5.70 ± 0.45	5.77 ± 0.50
Triglycerides	1.30 ± 0.54	1.22 ± 0.52	1.31 ± 0.54	1.28 ± 0.55	1.79 ± 0.88	1.64 ± 0.71	1.64 ± 0.74	1.60 ± 0.83
Alanine Transaminase	27.68 ± 10.82	25.51 ± 9.42 **	32.04 ± 14.49	29.43 ± 14.34 **	35.14 ± 13.27	34.31 ± 14.52	36.73 ± 17.50	31.94 ± 16.45 **
Uric Acid	352.88 ± 69.22	360.44 ± 63.49	345.06 ± 69.37	351.87 ± 73.68 *	384.00 ± 69.15	388.08 ± 59.82	376.31 ± 73.59	390.48 ± 80.02
High-sensitivity CRP	1.34 ± 1.44	1.25 ± 1.34	1.43 ± 1.27	1.44 ± 1.41	1.49 ± 1.35	1.63 ± 1.37	2.13 ± 1.70	2.04 ± 1.80
Apolipoprotein A1	1.45 ± 0.17	1.46 ± 0.19	1.47 ± 0.18	1.47 ± 0.18	1.33 ± 0.17	1.34 ± 0.15	1.30 ± 0.16	1.36 ± 0.17 **
Note: Values represent raw means and standard deviations. ** Indicates a significant (FDR < 0.05), and * nominal (P < 0.05) time effect within intervention group based on Generalized Estimating Equations (GEE). Models: Biomarkers ~ Time + Age + Gender + Education + Smoking + BMI baseline. Biomarkers High-sensitivity CRP, Triglycerides, and Alanine Transaminase were log-transformed. Statistics are…
	*

[truncated: 19 more sheets: Table 10, Table 11, Table 12, Table 13, Table 14, Table 15, Table 16, Table 17, Table 18, Table 19, Table 20, Table 21, Table 22, Table 23, Table 24, Table 25, Table 26, Table 27, Table 28]
