# Supplementary material for: Psychosocial Well-being and Genetic Predisposition Shape Responsiveness to Lifestyle Coaching: Insights from a Risk-Stratified Intervention Trial
Source: Research Square preprint supplement (doi:10.21203/rs.3.rs-7638506/v1), 2025-10-10
Supplement: Supplementary file 2 [file b8975ab05d1cb1a531dd906a.xlsx]

## Sheet: Table 2
Table 2. Phenotype characteristics by cardiometabolic risk level and intervention group at baseline and follow-up
	Medium cardiometabolic risk (Intervention, baseline)	Medium cardiometabolic risk (Intervention, follow-up)	Medium cardiometabolic risk (Control, baseline)	Medium cardiometabolic risk (Control, follow-up)	High cardiometabolic risk (Intervention, baseline)	High cardiometabolic risk (Intervention, follow-up)	High cardiometabolic risk (Control, baseline)	High cardiometabolic risk (Control, follow-up)
N	107	97	106	90	53	52	51	44
Gender (Male / Female)	88 / 19	80 / 17	82 / 24	69 / 21	50 / 3	49 / 3	42 / 9	37 / 7
Cohort (Nk / Rv / Kk)	86 / 11 / 10	78 / 9 / 10	86 / 11 / 9	72 / 10 / 8	42 / 6 / 5	42 / 5 / 5	41 / 5 / 5	35 / 5 / 4
Language (Finnish / English)	91 / 16	84 / 13	87 / 19	74 / 16	40 / 13	39 / 13	36 / 15	32 / 12
Wellbeing Cluster (Good / Hard / Life / Reco / Mult)	22 / 27 / 33 / 7 / 16	32 / 19 / 21 / 9 / 9	20 / 23 / 32 / 16 / 12	28 / 12 / 21 / 9 / 10	13 / 6 / 20 / 7 / 6	20 / 10 / 12 / 3 / 4	8 / 9 / 22 / 5 / 5	10 / 12 / 11 / 6 / 2
Smoking Status (Yes / Occasional smoker / No)	5 / 7 / 94	2 / 5 / 83	2 / 7 / 97	0 / 4 / 76	5 / 5 / 43	4 / 3 / 42	2 / 2 / 47	2 / 2 / 37
Age (years)	45.66 ± 8.10	46.26 ± 7.90	46.95 ± 8.14	46.47 ± 8.28	45.79 ± 9.08	45.88 ± 9.14	44.69 ± 7.93	45.14 ± 7.40
Height (cm)	176.84 ± 8.66	177.10 ± 8.98	175.02 ± 9.15	174.62 ± 9.43	177.81 ± 8.11	177.77 ± 8.05	177.00 ± 8.61	177.24 ± 8.00
Weight (kg)	84.61 ± 13.19	84.36 ± 13.34 **	84.80 ± 13.61	83.77 ± 14.09 **	88.26 ± 14.17	87.05 ± 13.94 **	93.34 ± 16.01	92.52 ± 14.44 **
Waist Circumference (cm)	94.45 ± 10.96	93.88 ± 10.95 **	95.56 ± 10.11	94.34 ± 10.32	96.99 ± 10.24	95.05 ± 10.18 **	101.87 ± 11.94	99.52 ± 10.51 **
Neck Circumference (cm)	38.51 ± 3.08	38.73 ± 2.99	38.21 ± 3.32	38.26 ± 2.98	39.91 ± 3.65	39.56 ± 3.40	40.01 ± 3.25	40.27 ± 2.72
Body Mass Index (kg/m^2)	26.97 ± 3.71	26.82 ± 3.75 **	27.69 ± 3.77	27.46 ± 3.73 *	27.83 ± 3.36	27.47 ± 3.34 **	29.83 ± 4.74	29.56 ± 4.72 **
Diastolic BP (mmHg)	84.75 ± 9.31	83.04 ± 9.89 **	83.35 ± 9.79	82.32 ± 8.80	86.29 ± 9.89	84.08 ± 10.40 **	89.03 ± 8.82	87.06 ± 7.65 **
Systolic BP (mmHg)	130.09 ± 13.76	127.28 ± 13.20 **	127.35 ± 12.78	125.36 ± 13.29 **	133.33 ± 14.59	129.72 ± 13.24 **	134.75 ± 14.13	133.26 ± 12.55 **
T2D Polygenic Risk Score	0.01 ± 1.22	†	0.14 ± 1.08	†	0.34 ± 1.13	†	0.11 ± 1.13	†
CHD Polygenic Risk Score	0.07 ± 0.93	†	0.09 ± 0.93	†	0.09 ± 0.90	†	0.09 ± 0.94	†
BMI Polygenic Risk Score	0.20 ± 0.99	†	0.06 ± 0.93	†	0.27 ± 1.04	†	0.17 ± 0.89	†
Note: Values represent raw means and standard deviations. ** Indicates a significant (FDR < 0.05), and * nominal (P < 0.05) time effect within intervention group based on Generalized Estimating Equations (GEE). Time effects were evaluated using GEE adjusting for Age, Gender, Education, and Smoking; models also included adjustment for Antihypertensive medication use when applicable for BP measures…
