# Supplementary material for: Psychosocial Well-being and Genetic Predisposition Shape Responsiveness to Lifestyle Coaching: Insights from a Risk-Stratified Intervention Trial
Source: Research Square preprint supplement (doi:10.21203/rs.3.rs-7638506/v1), 2025-10-10
Supplement: Supplementary file 3 [file ec073cd4e1dea6580747ed92.xlsx]

## Sheet: Table 1
Table 1. Baseline phenotype characteristics across low, medium, and high cardiometabolic risk groups
	Low cardiometabolic risk	Medium cardiometabolic risk	High cardiometabolic risk
N	394	213	104
Gender (Male / Female)	215 / 179	170 / 43	92 / 12
Cohort (Nk / Rv / Kk)	317 / 40 / 37	172 / 22 / 19	83 / 11 / 10
Language (Finnish / English)	337 / 57	178 / 35	76 / 28
Wellbeing Cluster (Good / Hard / Life / Reco / Mult)	107 / 90 / 97 / 58 / 33	42 / 50 / 65 / 23 / 28	21 / 15 / 42 / 12 / 11
Smoking Status (Yes / Occasional smoker / No)	8 / 21 / 360	7 / 14 / 191	7 / 7 / 90
Age (years)	44.48 ± 8.87	46.31 ± 8.12	45.25 ± 8.51
Height (cm)	172.47 ± 9.05	175.93 ± 8.93	177.41 ± 8.33
Weight (kg)	75.78 ± 13.66 #	84.70 ± 13.37 #	90.78 ± 15.25
Waist Circumference (cm)	86.76 ± 11.73 #	95.01 ± 10.53 #	99.41 ± 11.33
Neck Circumference (cm)	35.90 ± 3.43 #	38.36 ± 3.20 #	39.96 ± 3.44
Body Mass Index (kg/m^2)	25.39 ± 3.71 #	27.33 ± 3.75 #	28.82 ± 4.20
Diastolic BP (mmHg)	80.81 ± 9.62 #	84.06 ± 9.55 #	87.65 ± 9.43
Systolic BP (mmHg)	124.65 ± 14.93 #	128.75 ± 13.33 #	134.03 ± 14.31
T2D Polygenic Risk Score	0.02 ± 1.15	0.08 ± 1.15	0.22 ± 1.13
CHD Polygenic Risk Score	-0.12 ± 0.93	0.08 ± 0.93	0.09 ± 0.92
BMI Polygenic Risk Score	-0.06 ± 1.03 #	0.13 ± 0.96	0.22 ± 0.96
Note: Values represent raw means and standard deviations. # indicates FDR < 0.05 compared to the high-risk group based on GEE. Models: Anthropometrics ~ Cardiometabolic risk group + Age + Gender + Education + Smoking; Blood pressure ~ Cardiometabolic risk group + Age + Gender + Education + Smoking + Antihypertensive medication; PRS ~ Cardiometabolic risk group + Age + Gender + Cohort + Language. …
